# Supplementary material for: Bioinformatics Identification of Lactate-Associated Genes in Hepatocellular Carcinoma: G6PD’s Role in Immune Modulation
Source: Research Square preprint supplement (doi:10.21203/rs.3.rs-5748430/v1), 2025-01-06
Supplement: Supplementary file 1 [file 8f3f8aaa820abca0c5fb686c.docx]

Supplementary Information for

**Bioinformatics Identification of Lactate-Associated Genes in Hepatocellular Carcinoma: G6PD’s Role in Immune Modulation**

Hao-ran Qu1, 2#, Chao-qun Wang3, 4#, Su-juan Sun1, 2#, Wen-wen Zhang1, 2, Xuan-shuang Du3, 4, Yi-ao Shuozhuo3, 4, Xi-cheng Wang3, 4, Qin Pan1, 2, Feng-ling Luo1, 2, Hong-yan Wu5, 6*, Xiao-lian Zhang1, 2*, Min Liu1, 2*

**Affiliations**

1 State Key Laboratory of Virology, Hubei Province Key Laboratory of Allergy and Immunology, Department of Immunology Wuhan University Taikang Medical School (School of Basic Medical Sciences) Wuhan University, Wuhan, China.

2 Frontier Science Center for Immunology and Metabolism, Department of Allergy Zhongnan Hospital, Wuhan University School of Medicine, Wuhan, China.

3 Department of Neurosurgery, Renmin Hospital of Wuhan University, Wuhan, China.

4 Central Laboratory, Renmin Hospital of Wuhan University, Wuhan, China.

5Hubei Key Laboratory of Tumor Microenvironment and Immunotherapy, China Three Gorges University, Yichang 443002, China

6 China Three Gorges University, School of Basic Medicine, Yichang, China

*Corresponding author.

*Prof. Xiao-Lian Zhang, Ph.D., Department of Immunology, Wuhan University Taikang Medical School (School of Basic Medical Sciences), Donghu Road 185#, Wuhan 430071, Hubei Province, P. R. China, E-mail: zhangxiaolian@whu.edu.cn

*Assoc. Prof. Min Liu, Ph.D., Department of Immunology, Wuhan University Taikang Medical School (School of Basic Medical Sciences), Donghu Road 185#, Wuhan 430071, Hubei Province, P. R. China, E-mail: [mliu@whu.edu.cn](mailto:mliu@whu.edu.cn)

*Prof. Hong-yan Wu, Ph.D., Hubei Key Laboratory of Tumor Microenvironment and Immunotherapy, China Three Gorges University, Yichang 443002, China, E-mail: wuhongyan@ctgu.edu.cn

**The PDF file includes:**

Supplementary Figure S1 and S2


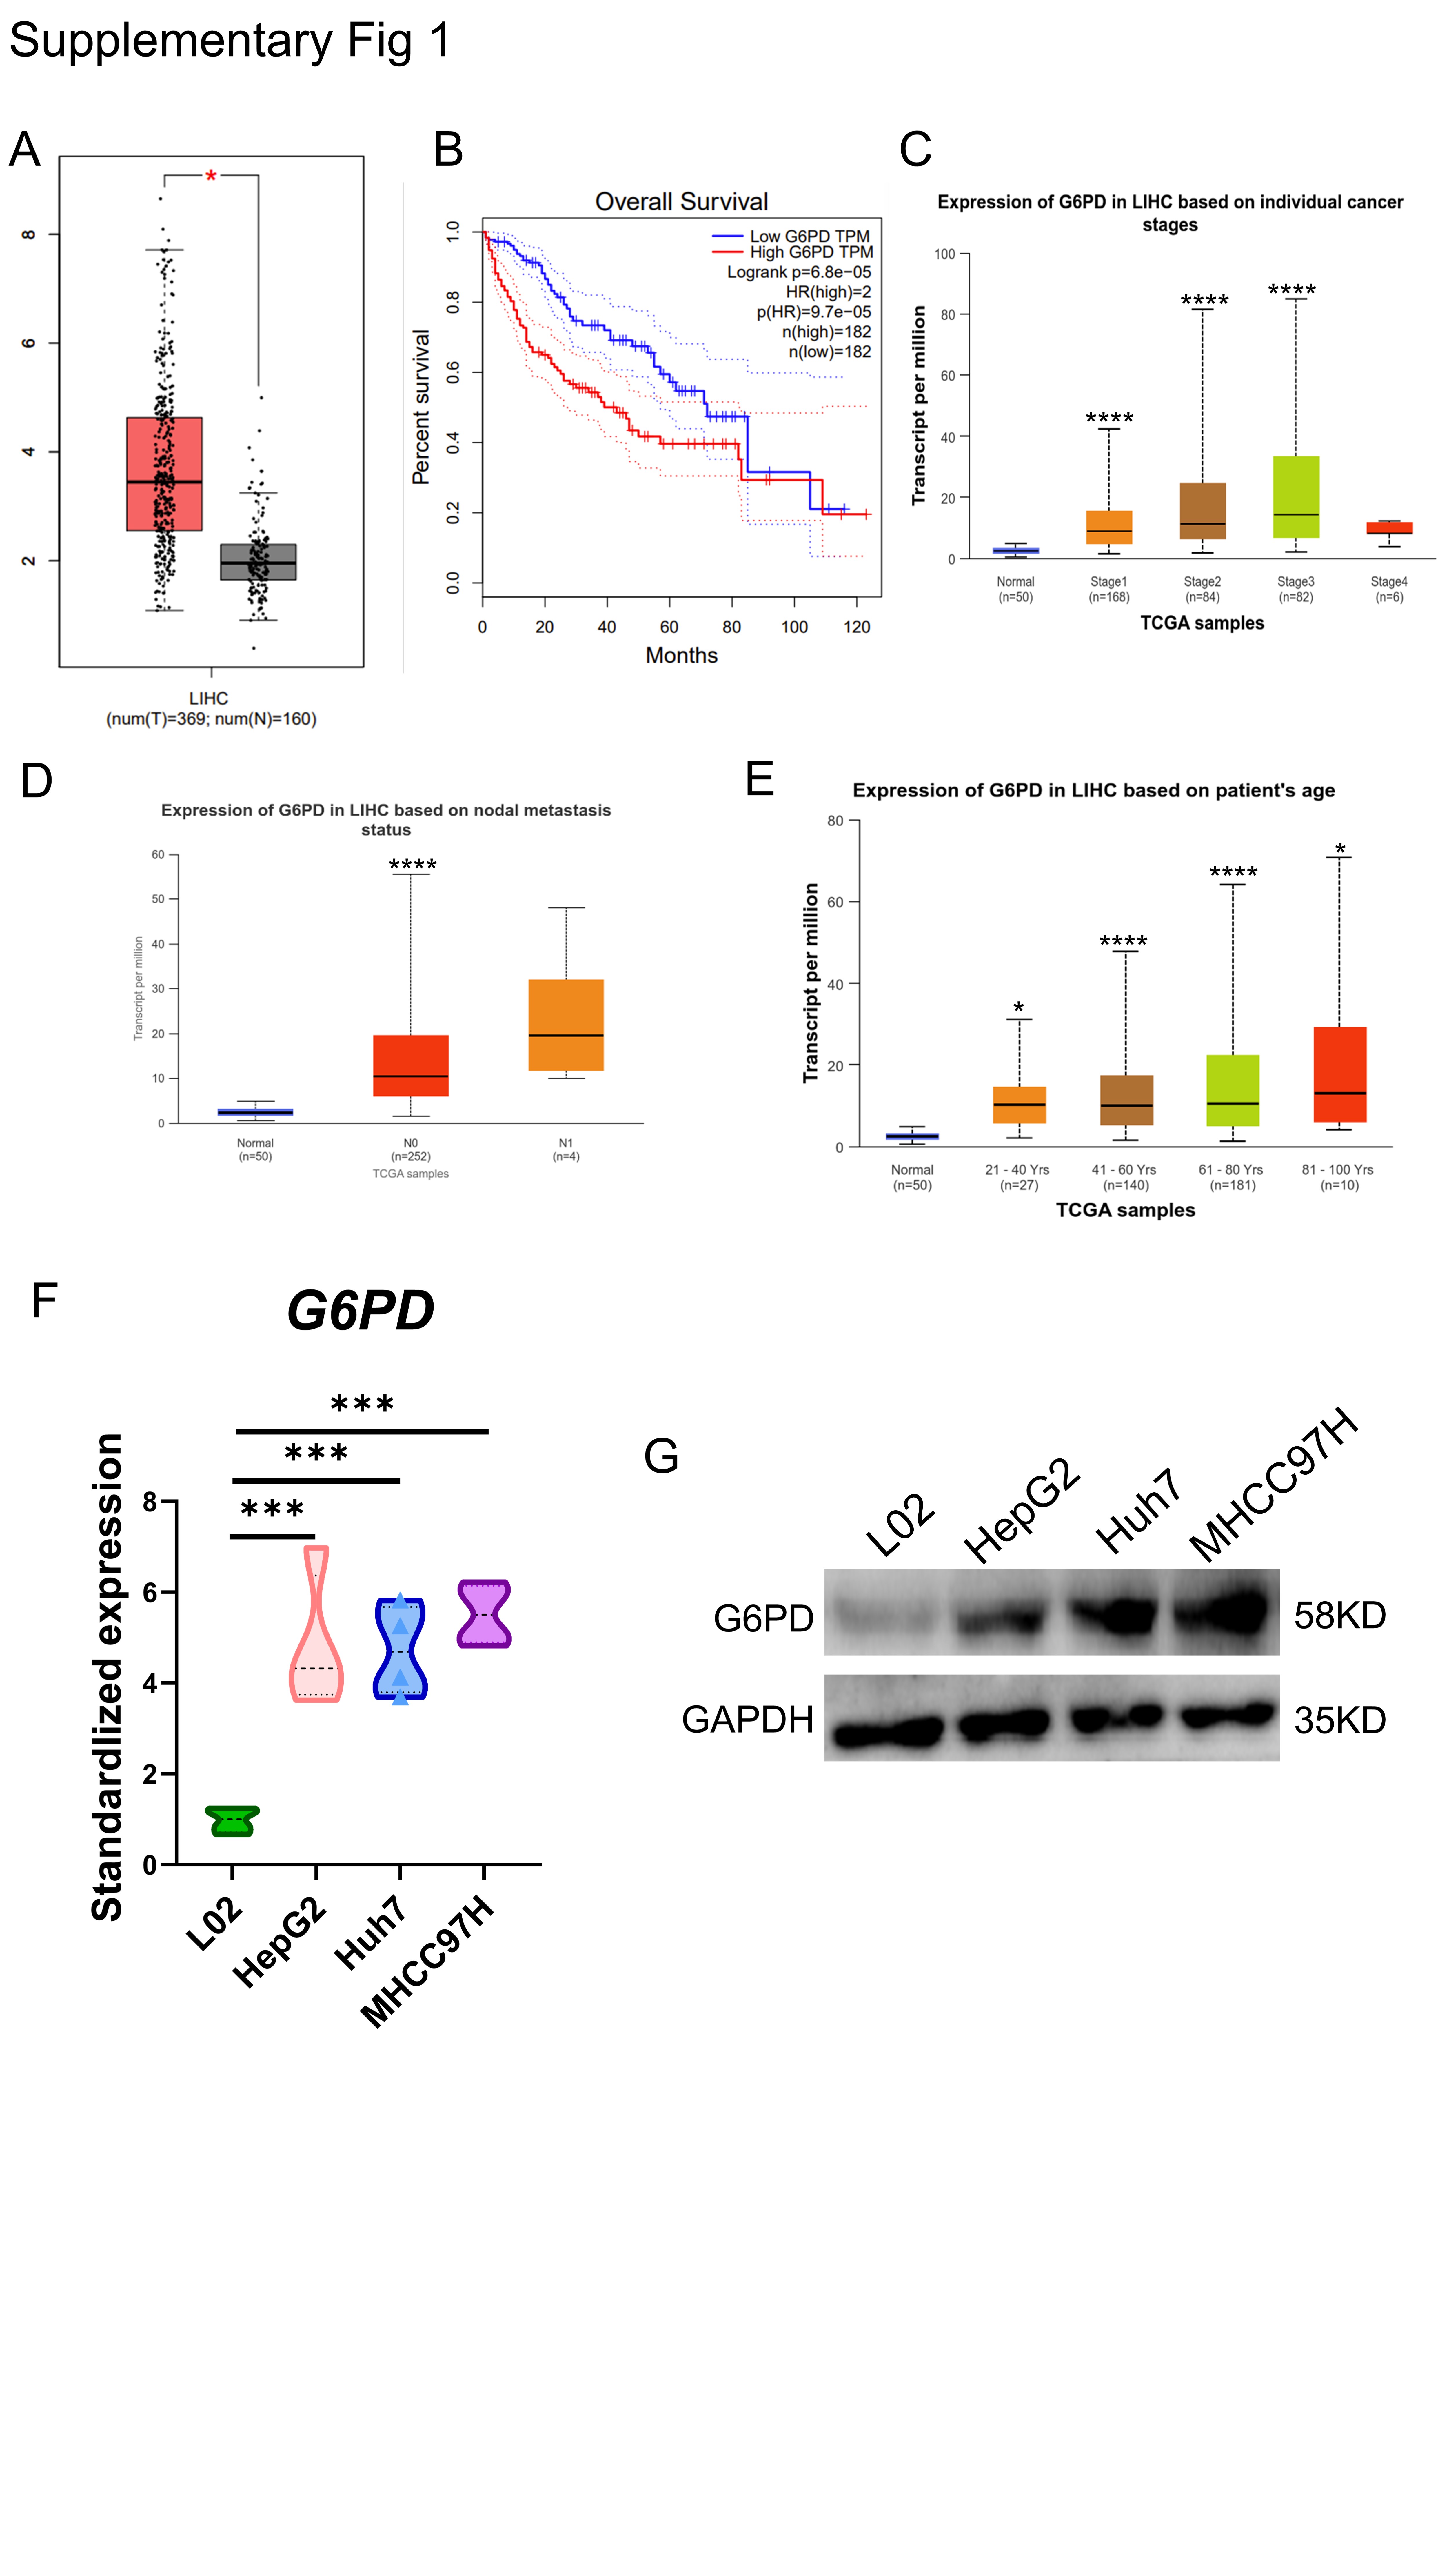


**Supplementary Figure 1: G6PD expression and its clinical relevance in LIHC.** (A) Comparison of G6PD mRNA expression levels between normal and tumor tissues in the LIHC dataset from TCGA reveals significantly higher expression in tumor samples compared to normal tissues. (B) Kaplan-Meier survival analysis for overall survival (OS) in LIHC patients stratified by high and low G6PD expression levels, showing that high G6PD expression is associated with poor OS. (C) G6PD expression across different cancer stages in the LIHC dataset shows an increase with advancing cancer stage. (D) G6PD expression based on nodal metastasis status shows significantly higher levels in tumors with lymph node metastasis (N1) compared to non-metastatic (N0) samples. (E) G6PD expression in LIHC patients stratified by age groups shows significant differences, with higher levels observed in older patients. (F) G6PD expression across liver cancer cell lines (HepG2, Huh7, MHCC97H) and the normal liver cell line (L02) shows significantly higher expression in cancer cell lines. (G) Western blot analysis of G6PD protein expression in liver cancer cell lines (HepG2, Huh7, HCC97H) and the normal liver cell line (L02) shows protein levels consistent with mRNA expression, confirming upregulation in cancer cell lines.


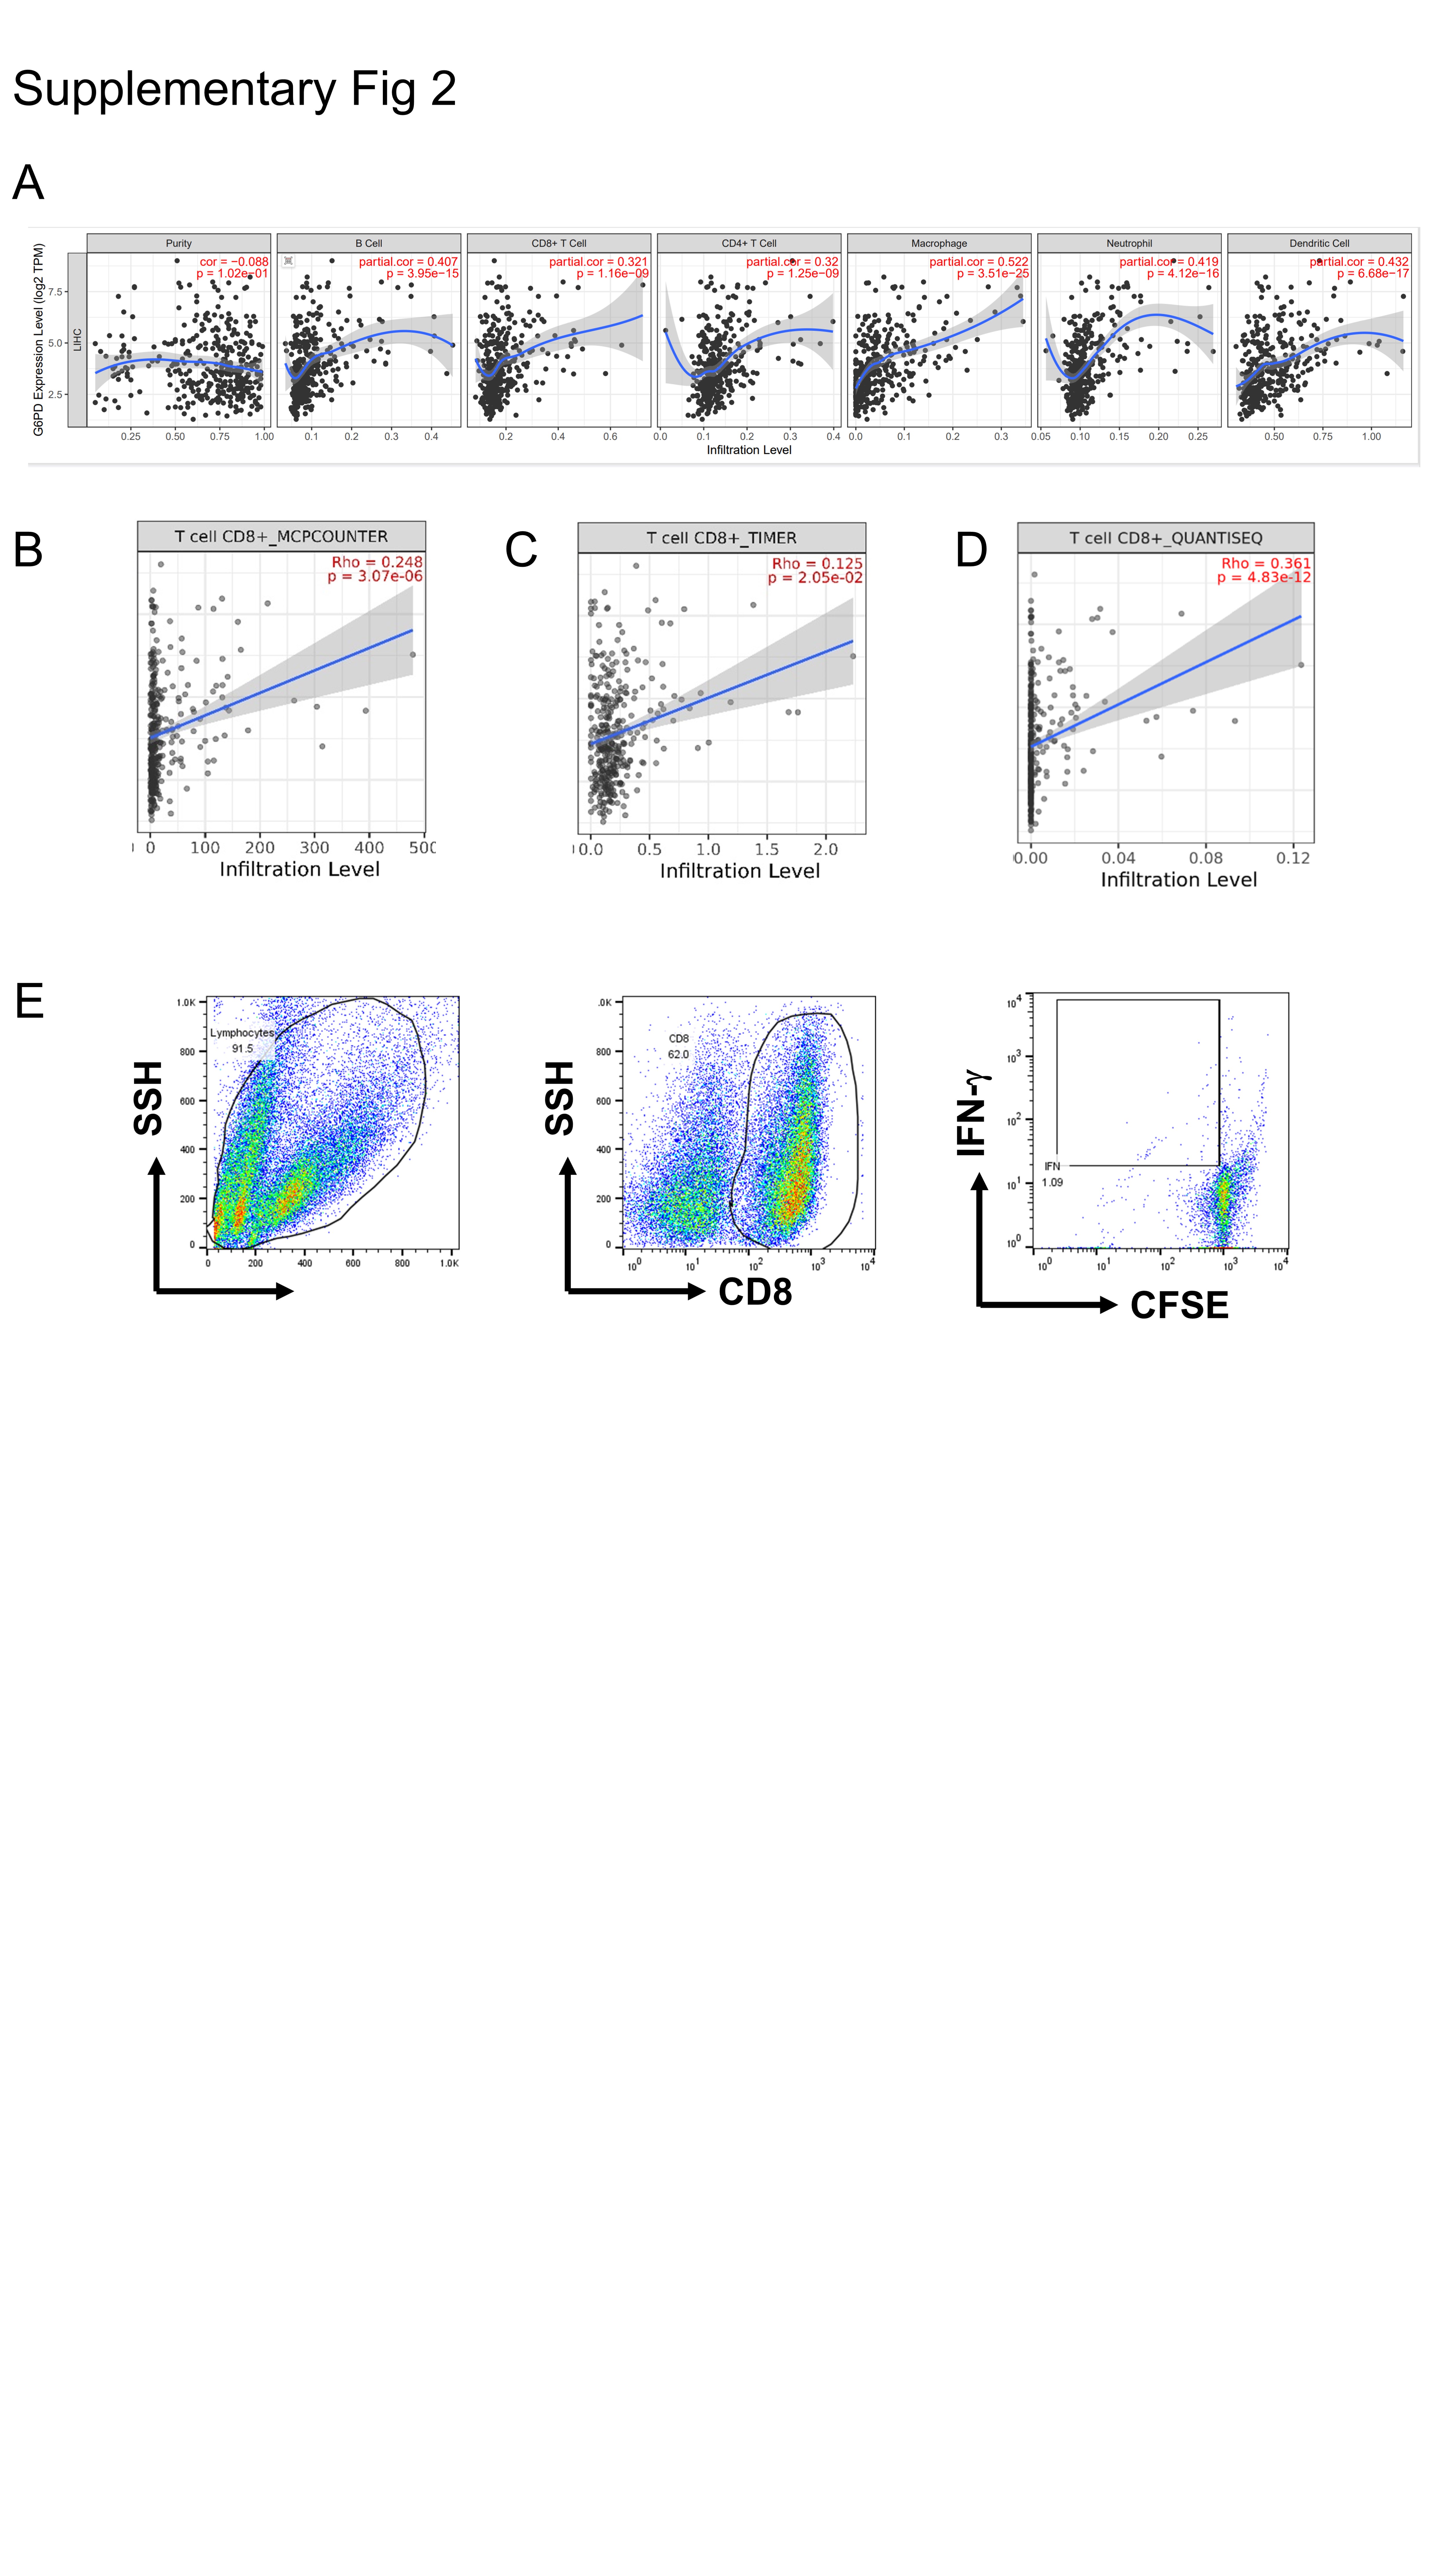


**Supplementary Figure 2: Correlation of G6PD Expression with Immune Infiltration and CD8+ T Cell Functionality in LIHC.** (A) Spearman correlation analysis between G6PD expression and infiltration levels of various immune cell types, including B cells, CD8+ T cells, CD4+ T cells, macrophages, neutrophils, and dendritic cells, from the TIMER database shows that G6PD expression is significantly positively correlated with CD8+ T cell and macrophage infiltration levels. (B-D) Scatter plots showing the correlation between G6PD expression and CD8+ T cell infiltration, assessed by the MCPcounter, TIMER, and QUANTISEQ algorithms, respectively, confirm a significant positive correlation in all three methods. (E) Flow cytometry analysis assessing the impact of G6PD modulation on CD8+ T cell proliferation and IFN-γ secretion. Human CD8+ T cells were labeled with CFSE and co-cultured with HepG2 cells with G6PD knockdown (KD) or overexpression (OE). After 3 days, cells were harvested, stained for CD8 and IFN-γ, and analyzed by flow cytometry to assess T cell proliferation (by CFSE dilution) and IFN-γ production.
